# Supplementary material for: Differentiation of Adipose Tissue Mesenchymal Stem Cells into Endothelial Cells Depends on Fat Depot Conditions: Regulation by miRNA
Source: MDPI journal article supplement (doi:10.3390/cells13060513), 2024-03-14
Supplement: s1 [file s1]

## Supplemental material

# The differentiation of adipose tissue mesenchymal stem cells into endothelial cells depends on fat depot and metabolic conditions: regulation by miRNA

Gemma Arderiu<sup>\*,\*,1,2</sup>, Anna Civit-Urgell<sup>\*,1</sup>, Fabrizio Moscatiello<sup>3</sup>, Lina Badimon<sup>1,2</sup>

<sup>1</sup> Cardiovascular-Program; Institut de Recerca de l'Hospital de la Santa Creu i Sant Pau. IIB-Sant Pau Barcelona, Spain; <sup>2</sup> Ciber CV, Instituto Carlos III, Madrid, Spain;

<sup>3</sup> Centro Médico Teknon, Grupo Quiron Salut, Barcelona, Spain.

\*Contributed equally to this work; +corresponding author

**Short Title:** MicroRNA sequencing depends on ASCs fat depot.

**Correspondence author:** Gemma Arderiu  
Cardiovascular-Program  
Institut de Recerca de Sant Pau- IIB Sant Pau  
C/ Sant Antoni M<sup>a</sup> Claret 167, 08025 Barcelona,  
Spain  
Tel: 34 93 556 58 80  
ORCID: 0000-0001-8598-4106  
E-mail: [garderi@ Sant Pau](mailto:garderi@ Sant Pau)

### **Supplementary figures:**

**Supplementary Figure S1:** Predicted targeted genes of significantly expressed miRNAs. Venn diagram of the candidate target genes predicted by four databases. Using Cytoscape software v3.9.0, miRNAs are shown in red ellipses (down-regulated) or green ellipses (up-regulated) with the black lines to the targeted gene in green rectangles (up-regulated) or red rectangles (down-regulated) nodes. Targeted genes in yellow are suggested for further validation due to their angiogenic properties.

**Supplementary Figure S2:** miRNAs relative expression in HeLa and HEK 293 cell lines. **(A)** Relative expression of miRNA-378a-3p in HeLa cells compared to sASCs, **(B)** Relative expression of miRNA-424-5p in HeLa cells compared to sASCs, and **(C)** Relative expression of miRNA-29b-3p in HEK 293 compared to sASCs. No statistically significant differences were found in any comparison.

Supplementary Figure S1

hsa-miRNA-424-5p

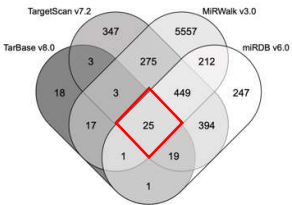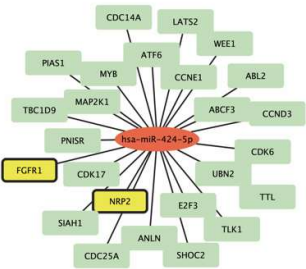

hsa-miRNA-378a-3p

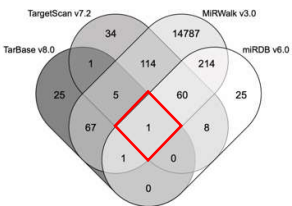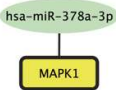

hsa-miRNA-29b-3p

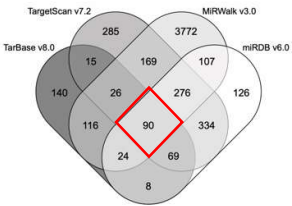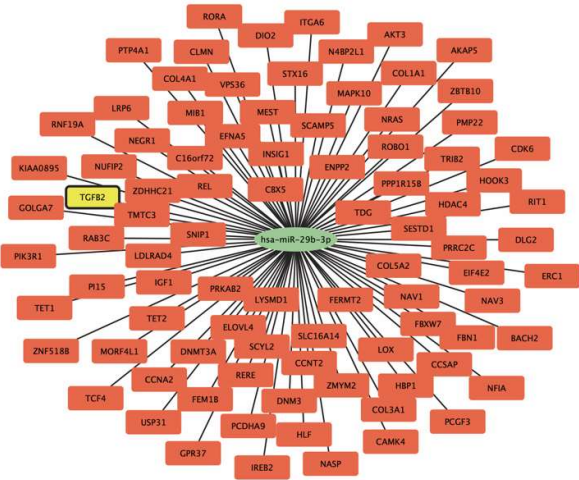

Supplementary Figure S2

**A**

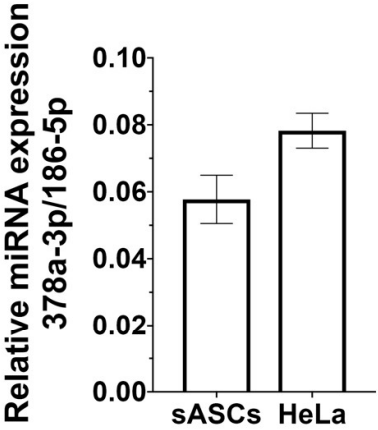

**B**

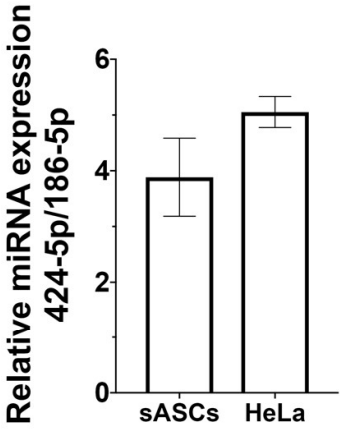

**C**

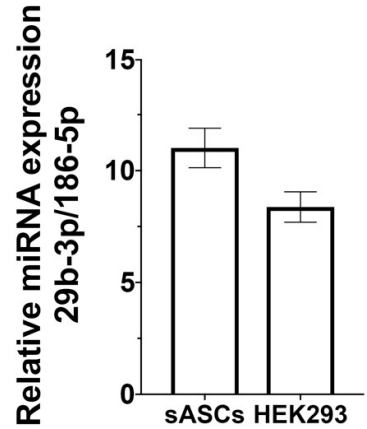

**Supplementary Table S1: Source of the bio-banked stem cells used in this study.**

| SUBJECTS                 | TISSUE SAMPLE               | SURGERY                                | AGE       | SEX              | BMI (KG/M <sup>2</sup> ) | WEIGHT (KG)  |
|--------------------------|-----------------------------|----------------------------------------|-----------|------------------|--------------------------|--------------|
| <b>N=6</b>               | Subcutaneous                | Abdominal lipectomy                    | 39,2±11,5 | 4 Women<br>2 Men | 23,97±3,60               | 69±14,23     |
| <b>N=6</b><br><b>N=6</b> | Subcutaneous and<br>omentum | Gastric by-pass and<br>cholecystectomy | 50,8±9,2  | 3 Women<br>3 Men | 41,69±7,56               | 115,03±26,52 |

Data are presented as the mean±SD.

UP-REGULATED miRNAs in ECL cells from lean sASCs versus original lean sASCs

| microRNA           | Fold change | p-value  | Average expression |
|--------------------|-------------|----------|--------------------|
| hsa-miRNA-29b-3p   | 1705,73     | 3,14E-05 | 3,21               |
| hsa-miRNA-146a-5p  | 1553,38     | 4,27E-04 | 5,69               |
| hsa-miRNA-378c     | 1095,23     | 3,81E-06 | 4,86               |
| hsa-miRNA-92a-1-5p | 774,20      | 9,01E-05 | 3,62               |
| hsa-miRNA-378a-3p  | 648,58      | 1,32E-06 | 7,00               |
| hsa-miRNA-422a     | 452,75      | 1,23E-03 | 3,73               |
| hsa-miRNA-199b-5p  | 432,59      | 1,11E-05 | 1,94               |
| hsa-miRNA-708-5p   | 394,28      | 1,55E-04 | 6,78               |
| hsa-miRNA-378i     | 295,13      | 1,73E-03 | 3,10               |
| hsa-miRNA-222-5p   | 286,92      | 2,50E-03 | 2,65               |
| hsa-miRNA-378f     | 182,68      | 6,30E-03 | 3,66               |
| hsa-miRNA-4284     | 137,45      | 2,62E-05 | 5,69               |
| hsa-miRNA-31-3p    | 116,87      | 9,46E-06 | 5,91               |
| hsa-miRNA-7110-5p  | 112,27      | 1,52E-04 | 3,98               |
| hsa-miRNA-29b-1-5p | 81,15       | 2,38E-07 | 7,62               |
| hsa-miRNA-221-5p   | 79,35       | 2,87E-03 | 4,24               |
| hsa-miRNA-584-5p   | 79,07       | 4,16E-03 | 3,85               |
| hsa-miRNA-25-5p    | 78,19       | 2,84E-03 | 3,88               |

DOWN-REGULATED miRNAs in ECL cells from Lean sASCs versus original lean sASCs

| microRNA            | Fold change | p-value  | Average expression |
|---------------------|-------------|----------|--------------------|
| hsa-miRNA-27b-5p    | 0,011871997 | 2,27E-03 | 4,51               |
| hsa-miRNA-585-5p    | 0,009948639 | 5,09E-03 | 3,81               |
| hsa-miRNA-675-5p    | 0,00481043  | 1,25E-03 | 2,27               |
| hsa-miRNA-424-3p    | 0,004027724 | 2,85E-07 | 8,24               |
| hsa-miRNA-503-5p    | 0,004023201 | 6,51E-08 | 7,40               |
| hsa-miRNA-424-5p    | 0,002000294 | 1,41E-05 | 2,42               |
| hsa-miRNA-143-3p    | 0,0019046   | 1,62E-07 | 9,61               |
| hsa-miRNA-145-5p    | 0,001337622 | 1,02E-08 | 10,77              |
| hsa-miRNA-542-5p    | 0,000864988 | 2,90E-05 | 3,09               |
| hsa-miRNA-181a-2-3p | 0,000644403 | 8,53E-06 | 5,09               |

**Supplementary Table S2:** Differential expression of miRNAs in ECL cells differentiated from sASCs of lean individuals versus the parental undifferentiated sASCs (significantly changed).

UP-REGULATED miRNAs in ECL cells from obese sACSs versus original obese sASCs

| microRNA           | Fold change | p-value  | Average expression |
|--------------------|-------------|----------|--------------------|
| hsa-miRNA-422a     | 441,09      | 1,28E-03 | 3,73               |
| hsa-miRNA-199b-5p  | 283,99      | 3,44E-05 | 1,94               |
| hsa-miRNA-146a-5p  | 211,64      | 8,11E-03 | 5,69               |
| hsa-miRNA-378c     | 149,27      | 4,87E-04 | 4,86               |
| hsa-miRNA-92a-1-5p | 133,83      | 2,79E-03 | 3,62               |
| hsa-miRNA-7641     | 130,91      | 1,57E-03 | 6,24               |
| hsa-miRNA-3175     | 125,42      | 2,14E-03 | 3,00               |
| hsa-miRNA-378a-3p  | 106,16      | 2,24E-04 | 7,00               |
| hsa-miRNA-378f     | 105,69      | 1,37E-02 | 3,66               |
| hsa-miRNA-708-5p   | 82,31       | 3,87E-03 | 6,78               |
| hsa-miRNA-25-5p    | 71,79       | 3,37E-03 | 3,88               |
| hsa-miRNA-218-5p   | 65,32       | 7,65E-04 | 1,67               |

DOWN-REGULATED miRNAs in ECL cells from obese sACSs versus original obese sASCs

| microRNA            | Fold change | p-value  | Average expression |
|---------------------|-------------|----------|--------------------|
| hsa-miRNA-98-5p     | 0,01455     | 5,21E-04 | 3,21               |
| hsa-miRNA-493-3p    | 0,01330     | 8,11E-04 | 5,45               |
| hsa-miRNA-628-3p    | 0,01175     | 4,14E-03 | 3,30               |
| hsa-miRNA-1296-5p   | 0,01005     | 1,09E-02 | 3,12               |
| hsa-miRNA-503-5p    | 0,01001     | 2,52E-06 | 7,40               |
| hsa-miRNA-433-3p    | 0,00906     | 3,26E-05 | 5,95               |
| hsa-miRNA-424       | 0,00866     | 2,43E-07 | 2,19               |
| hsa-miRNA-424-3p    | 0,00748     | 2,87E-06 | 8,24               |
| hsa-miRNA-27b-5p    | 0,00723     | 7,90E-04 | 4,51               |
| hsa-miRNA-329-3p    | 0,00629     | 5,96E-04 | 3,80               |
| hsa-miRNA-495-3p    | 0,00564     | 1,91E-03 | 4,51               |
| hsa-miRNA-503-3p    | 0,00563     | 5,74E-06 | 1,94               |
| hsa-miRNA-1185-1-3p | 0,00562     | 6,65E-05 | 4,76               |
| hsa-miRNA-487a-5p   | 0,00510     | 3,93E-04 | 3,91               |
| hsa-miRNA-664a-5p   | 0,00498     | 1,48E-05 | 2,56               |
| hsa-miRNA-143-5p    | 0,00435     | 1,07E-06 | 1,89               |
| hsa-miRNA-154-5p    | 0,00403     | 7,83E-04 | 3,70               |
| hsa-miRNA-377-5p    | 0,00379     | 3,31E-05 | 3,21               |
| hsa-miRNA-126-3p    | 0,00368     | 1,68E-04 | 5,60               |
| hsa-miRNA-210-5p    | 0,00331     | 6,38E-06 | 2,49               |
| hsa-miRNA-10b-3p    | 0,00302     | 4,28E-05 | 2,01               |
| hsa-miRNA-145-5p    | 0,00289     | 1,68E-07 | 10,77              |

|                     |         |          |      |
|---------------------|---------|----------|------|
| hsa-miRNA-493-5p    | 0,00275 | 8,21E-04 | 4,04 |
| hsa-miRNA-140-5p    | 0,00270 | 1,35E-04 | 4,81 |
| hsa-miRNA-6511a-3p  | 0,00245 | 4,33E-06 | 3,26 |
| hsa-miRNA-181d-5p   | 0,00241 | 1,85E-06 | 3,91 |
| hsa-miRNA-487a-3p   | 0,00203 | 1,61E-04 | 4,77 |
| hsa-miRNA-210-3p    | 0,00189 | 3,29E-07 | 7,70 |
| hsa-miRNA-143-3p    | 0,00176 | 1,24E-07 | 9,61 |
| hsa-miRNA-23b-5p    | 0,00135 | 1,41E-04 | 4,58 |
| hsa-miRNA-424-5p    | 0,00060 | 5,83E-07 | 2,42 |
| hsa-miRNA-542-5p    | 0,00060 | 1,31E-05 | 3,09 |
| hsa-miRNA-1290      | 0,00021 | 8,97E-06 | 3,81 |
| hsa-miRNA-181a-2-3p | 0,00005 | 2,04E-08 | 5,09 |

**Supplementary Table S3:** Differential expression of miRNAs in ECL cells differentiated from ASCs of obese individuals versus the parental undifferentiated sASCs (significantly changed).

UP-REGULATED miRNAs in ECL cells from obese vASCs versus original obese vASCs

| microRNA         | Fold change | p-value  | Average expression |
|------------------|-------------|----------|--------------------|
| hsa-miRNA-214-5p | 178,40      | 5,36E-03 | 4,78               |
| hsa-miRNA-222-5p | 70,00       | 2,04E-02 | 2,65               |

DOWN-REGULATED miRNAs in ECL cells from obese vASCs versus original obese vASCs

| microRNA           | Fold change | p-value  | Average expression |
|--------------------|-------------|----------|--------------------|
| hsa-miRNA-200b-3p  | 0,015       | 6,87E-05 | 1,34               |
| hsa-miRNA-27b-5p   | 0,007       | 6,96E-04 | 4,51               |
| hsa-miRNA-30c-2-3p | 0,005       | 3,57E-04 | 3,24               |
| hsa-miRNA-1290     | 0,003       | 1,28E-03 | 3,81               |

**Supplementary Table S4:** Differential expression of miRNAs in ECL cells differentiated from vASCs of obese individuals versus the parental undifferentiated vASCs (significantly changed).

| miRNA             | Target genes                                                                                                                                                                                                                                                                                                                                                                                                                                                                                                                                                                                                                                                                                   | Angiogenesis association                                                                                                                                                                                                     |
|-------------------|------------------------------------------------------------------------------------------------------------------------------------------------------------------------------------------------------------------------------------------------------------------------------------------------------------------------------------------------------------------------------------------------------------------------------------------------------------------------------------------------------------------------------------------------------------------------------------------------------------------------------------------------------------------------------------------------|------------------------------------------------------------------------------------------------------------------------------------------------------------------------------------------------------------------------------|
| hsa-miRNA-424-5p  | <i>ABCF3, ABL2, ANLN, ATF6, CCND3, CCNE1, CDC14A, CDC25A, CDK17, CDK6, E2F3, <b>FGFR1</b>, LATS2, MAP2K1, MYB, <b>NRP2</b>, PIAS1, PNISR, SHOC2, SIAH1, TBC1D9, TLK1, TTL, UBN2, WEE1</i>                                                                                                                                                                                                                                                                                                                                                                                                                                                                                                      | Chamorro-Jorganes, A. <i>et al.</i> (2011) [1].<br>Alghamdi, A. A. A. <i>et al.</i> (2020) [2].<br>Zachary, I. <i>et al.</i> (2014) [3].<br>Dallinga, MG. <i>et al.</i> (2021) [4].<br>Geretti, E. <i>et al.</i> (2008) [5]. |
| hsa-miRNA-378a-3p | <b><u>MAPK1</u></b>                                                                                                                                                                                                                                                                                                                                                                                                                                                                                                                                                                                                                                                                            | Ricard, N. <i>et al.</i> (2019) [6].<br>Srinivasan, R. <i>et al.</i> (2009) [7].<br>Walker, AMN. <i>et al.</i> (2021) [8].                                                                                                   |
| hsa-miRNA-29b-3p  | <i>AKAP5, AKT3, BACH2, C16orf72, CAMK4, CBX5, CCNA2, CCNT2, CCSAP, CDK6, CLMN, COL1A1, COL3A1, COL4A1, COL5A2, DIO2, DLG2, DNM3, DNMT3A, EFNA5, EIF4E2, ELOVL4, ENPP2, ERC1, FBN1, FBXW7, FEM1B, FERMT2, GOLGA7, GPR37, HBP1, HDAC4, HLF, HOOK3, IGF1, INSIG1, IREB2, ITGA6, KIAA0895, LDLRAD4, LOX, LRP6, LYSMD1, MAPK10, MEST, MIB1, MORF4L1, N4BP2L1, NASP, NAV1, NAV3, NEGR1, NFIA, NRAS, NUFIP2, PCDHA9, PCGF3, PI15, PIK3R1, PMP22, PPP1R15B, PRKAB2, PRRC2C, PTP4A1, RAB3C, REL, RERE, RIT1, RNF19A, ROBO1, RORA, SCAMP5, SCYL2, SESTD1, SLC16A14, SNIP1, STX16, TCF4, TDG, TET1, TET2, <b>TGF-<math>\beta</math>2</b>, TMTC3, TRIB2, USP31, VPS36, ZBTB10, ZDHHC21, ZMYM2, ZNF518B</i> | Liao, K. H. <i>et al.</i> (2017) [9].<br>Di Bernardini, E. <i>et al.</i> (2014) [10].                                                                                                                                        |
| hsa-miRNA-146a-5p | <i>APPL1, FBXW2, IRAK1, KLF7, LCOR, MYBL1, NOVA1, NUCKS1, RFX7, RIMS2, RUNX1T1, SAMD8, SCN3B, TDRKH, ZBTB2, ZNF512B, ZNRF3</i>                                                                                                                                                                                                                                                                                                                                                                                                                                                                                                                                                                 |                                                                                                                                                                                                                              |
| hsa-miRNA-214-5p  | <i>CISH</i>                                                                                                                                                                                                                                                                                                                                                                                                                                                                                                                                                                                                                                                                                    |                                                                                                                                                                                                                              |

Genes marked in red are selected for validation due to their angiogenic properties.

**Supplementary Table S5:** List of the candidate target genes predicted by four databases and their relation to angiogenesis and neovessel formation.

## **References**

1. Chamorro-Jorganes A, Araldi E, Penalva LOF, et al (2011) MicroRNA-16 and MicroRNA-424 regulate cell-autonomous angiogenic functions in endothelial cells via targeting vascular endothelial growth factor receptor-2 and fibroblast growth factor receptor-1. *Arterioscler Thromb Vasc Biol* 31:2595–2606. <https://doi.org/10.1161/ATVBAHA.111.236521>
2. Alghamdi AAA, Benwell CJ, Atkinson SJ, et al (2020) NRP2 as an Emerging Angiogenic Player; Promoting Endothelial Cell Adhesion and Migration by Regulating Recycling of  $\alpha 5$  Integrin. *Front Cell Dev Biol* 8:1–16. <https://doi.org/10.3389/fcell.2020.00395>
3. Zachary I (2014) Neuropilins: role in signalling, angiogenesis and disease. *Chem Immunol Allergy* 99:37–70. <https://doi.org/10.1159/000354169>
4. Dallinga MG, Habani YI, Schimmel AWM, et al (2021) The Role of Heparan Sulfate and Neuropilin 2 in VEGFA Signaling in Human Endothelial Tip Cells and Non-Tip Cells during Angiogenesis In Vitro. *Cells* 10:. <https://doi.org/10.3390/CELLS10040926>
5. Geretti E, Shimizu A, Klagsbrun M (2008) Neuropilin structure governs VEGF and semaphorin binding and regulates angiogenesis. *Angiogenesis* 11:31–39. <https://doi.org/10.1007/S10456-008-9097-1>
6. Ricard N, Zhang J, Zhuang ZW, Simons M (2019) Isoform-Specific Roles of ERK1 and ERK2 in Arteriogenesis. *Cells* 9:1–17. <https://doi.org/10.3390/cells9010038>
7. Srinivasan R, Zabuawala T, Huang H, et al (2009) Erk1 and erk2 regulate endothelial cell proliferation and migration during mouse embryonic angiogenesis. *PLoS One* 4:. <https://doi.org/10.1371/journal.pone.0008283>
8. Walker AMN, Warmke N, Mercer B, et al (2021) Endothelial Insulin Receptors Promote VEGF-A Signaling via ERK1/2 and Sprouting Angiogenesis. *Endocrinology* 162:. <https://doi.org/10.1210/ENDOCR/BQAB104>
9. Liao KH, Chang SJ, Chang HC, et al (2017) Endothelial angiogenesis is directed by RUNX1T1-regulated VEGFA, BMP4 and TGF- $\beta 2$  expression. *PLoS One* 12:1–19. <https://doi.org/10.1371/journal.pone.0179758>
10. Di Bernardini E, Campagnolo P, Margariti A, et al (2014) Endothelial Lineage Differentiation from Induced Pluripotent Stem Cells Is Regulated by MicroRNA-21 and Transforming Growth Factor  $\beta 2$  (TGF- $\beta 2$ ) Pathways. *J Biol Chem* 289:3383. <https://doi.org/10.1074/JBC.M113.495531>
